# Supplementary material for: Molecular basis of human trace amine-associated receptor 1 activation
Source: PubMed Central journal article supplement (PMC10762035; doi:10.1038/s41467-023-44601-4), 2024-01-02
Supplement: 41467_2023_44601_MOESM1_ESM.pdf [file 41467_2023_44601_MOESM1_ESM.pdf]

Supplementary Information for

# **Molecular Basis of Human Trace Amine-Associated Receptor 1 Activation**

Gregory Zilberg\*, Alexandra K. Parpounas, Audrey L. Warren, Shifan Yang, Daniel Wacker\*

\*To whom correspondence should be addressed: Gregory Zilberg (greg.zilberg@icahn.mssm.edu), Daniel Wacker (Daniel.wacker@mssm.edu)

This file includes:

Supplementary Figures 1-7

Supplementary Tables 1-3

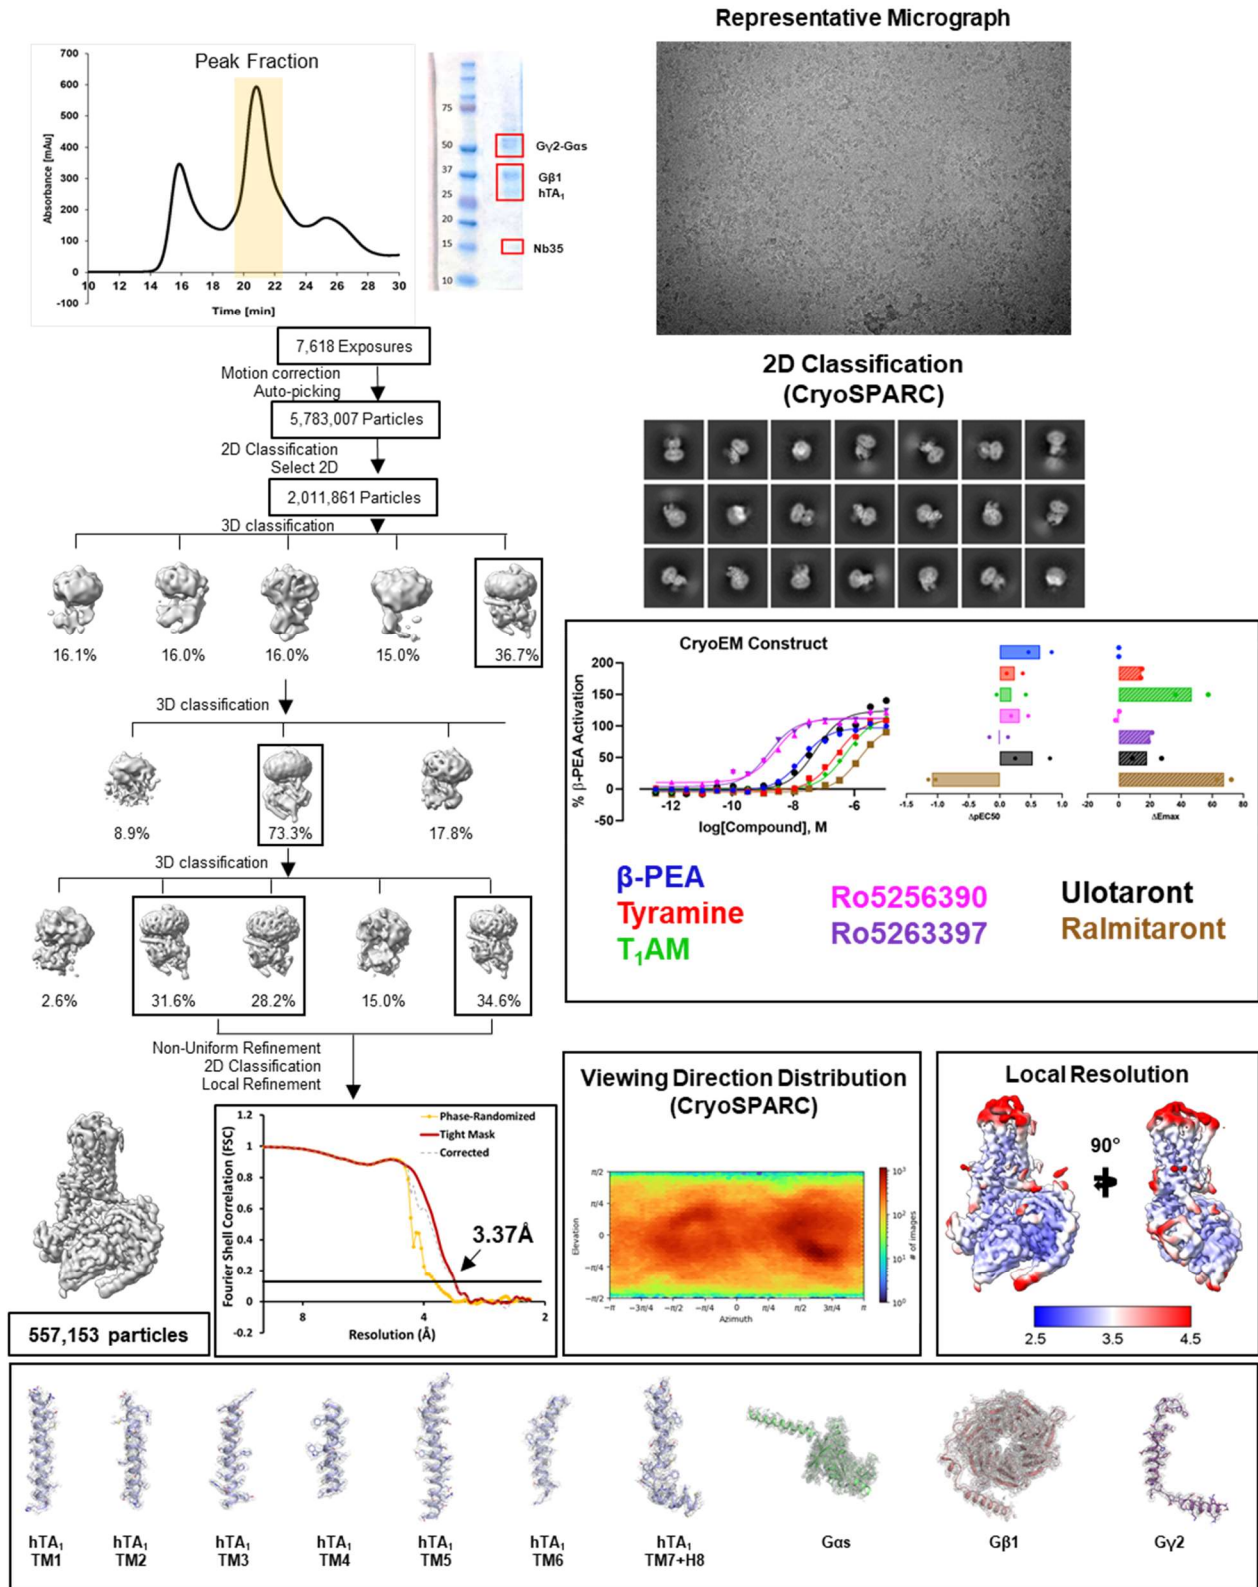

**Supplementary Fig. 1 | Purification, and cryo-EM structure determination of the Ro5256390-bound hTA1-Gs-Nb35 complex.** Analytical size exclusion chromatography and SDS-PAGE show monodisperse and pure hTA1-Gs-Nb35

complex. Data were collected on a 300 keV Krios, a representative micrograph is shown, and processed in cryoSPARC v4.1.2.: Particles were picked from motion corrected micrographs, subjected to 2D classification (representative classes are shown), followed by ab initio model building and 3D classification. After multiple rounds of 3D classification, the particle stack was subjected to non-uniform refinement. We further removed bad particles through a final 2D classification step, before performing local refinement using a receptor-only mask built based on the mask generated by cryoSPARC for the non-uniform refinement job. A final map was obtained with GS-FSC indicating a resolution of 3.37 Å applying the 0.143 cutoff. Viewing direction distribution analysis (cryoSPARC) indicates sufficient coverage. An initial model was built in PHENIX, and then further refined in ServalCat for the generation of final maps and coordinates. Calculations in cryoSPARC indicate local resolutions of up to 3 Å around the compound binding site. Viewing direction analysis indicates isotropic distribution of views in final particle stack. Bottom panel shows representative cryoEM densities (grey mesh) of receptor helices (light blue), Gas (green), Gβ1 (salmon), and Gγ2 (purple) subunits at  $4\sigma$ . Insert also shows activation of the cryoEM construct  $\beta_2$ AR-Nterm-hTA1-F112<sup>3.41</sup>W in transfected HEK293T cells mediated by a panel of agonists. Data represent mean  $\pm$  SEM of two independent experiments (n=2) performed in triplicate. See Supplementary Table 1 for fitted parameter values. Differences in efficacies and potencies compared to the wildtype construct are shown as bar graphs.

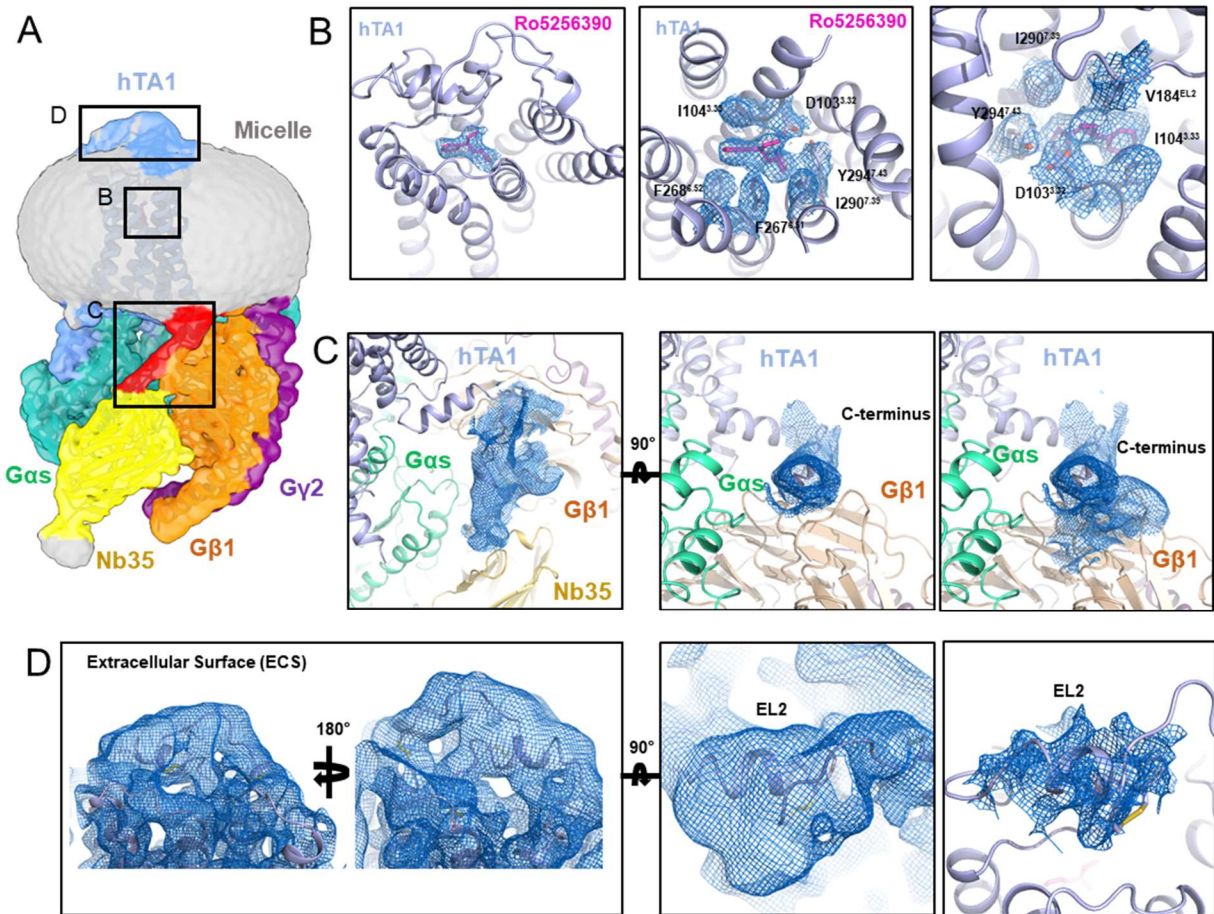

**Supplementary Fig. 2 | Representative Cryo-EM density of Ro5256390-bound hTA1-Gs-Nb35 complex.** **A**, Overall unsharpened cryo-EM density of the Ro5256390-bound hTA1-Gs-Nb35 complex, colored by element and featuring inlays demonstrating the relative location of subsequent local density figures B-D. hTA1, light blue; C-terminus of hTA1, red; Ro5256390, magenta; Gas, green; G $\beta$ 1, orange; Gy2, purple, Nb35, yellow, detergent micelle, grey. **B**, Sharpened cryo-EM density of the ligand Ro5256390 and nearby residues within the OBP shown as blue mesh at a contour level of  $6\sigma$ . **C**, Unsharpened cryo-EM density of the C-terminal tail of hTA1 packing against G $\beta$ 1 shown as blue mesh at a contour level of  $4\sigma$ . **D**, Unsharpened cryo-EM density (3 left panels) and sharpened cryo-EM density (right panel) of the hTA1 extracellular surface shown as blue mesh at a contour level of  $6\sigma$  and  $4\sigma$ , respectively.

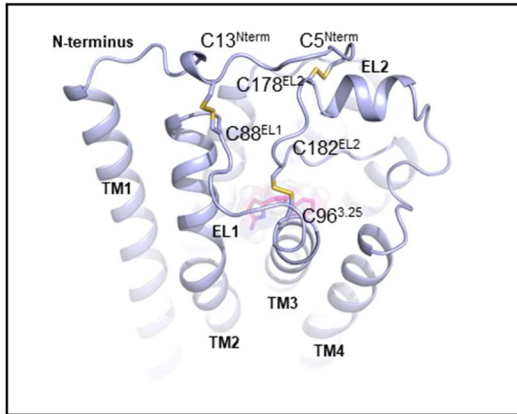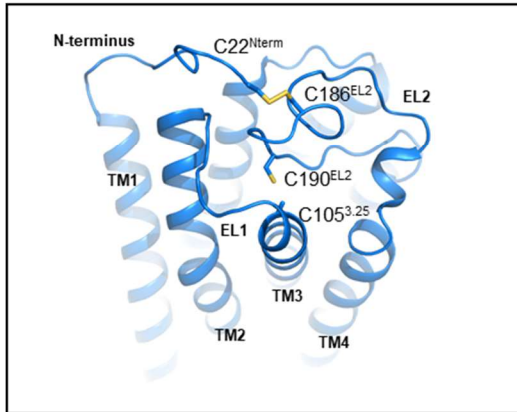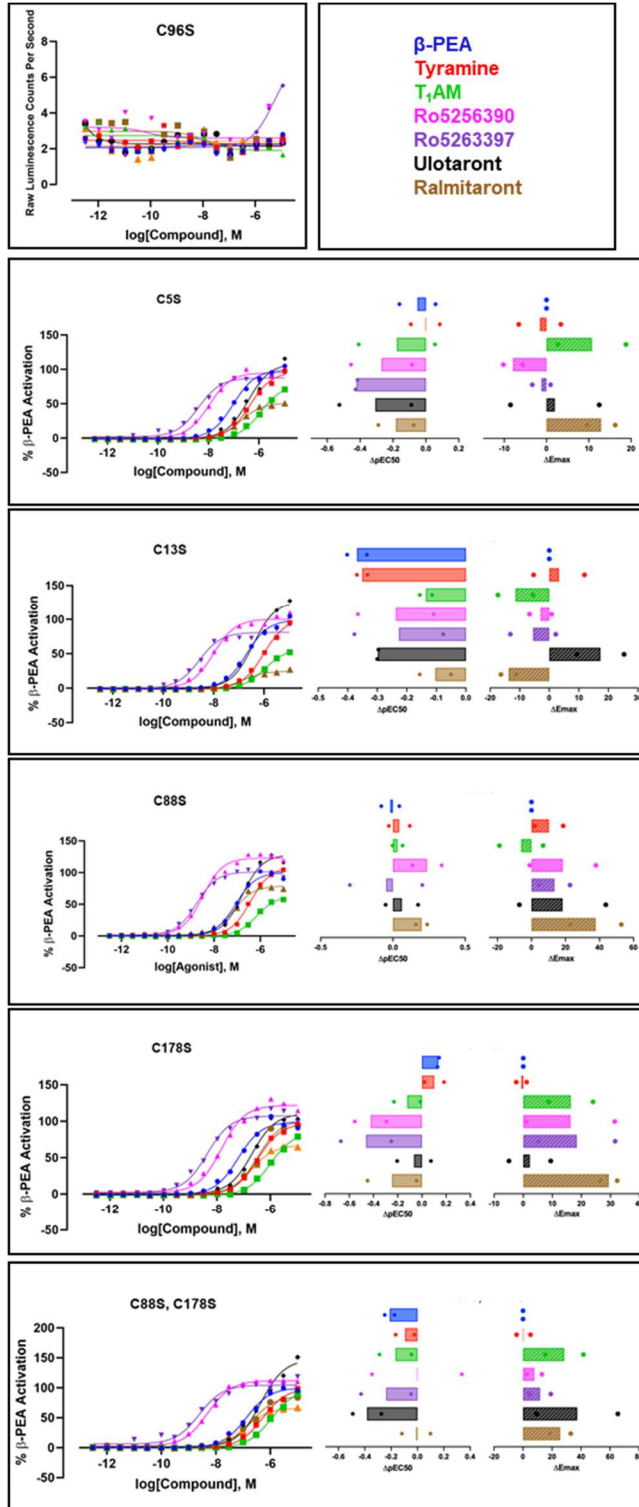

**Supplementary Fig. 3 | Importance of the extracellular disulfide network for activities of hTA1 agonists.** Zoom-in on the extracellular disulfide network of hTA1 (light blue) and mTAAR9 (marine blue) with key cysteines shown as sticks (left). Effects of cysteine mutations on the activities of hTA1 agonists (right). Data are shown both as full concentration response curves and as bar graphs denoting differences between mutant and wild type receptor with potencies determined as pEC<sub>50</sub>s and efficacies measured as E<sub>max</sub>. Data represent mean ± SEM of two independent experiments (n=2) performed in triplicate. See Supplementary Table 1 for fitted parameter values.



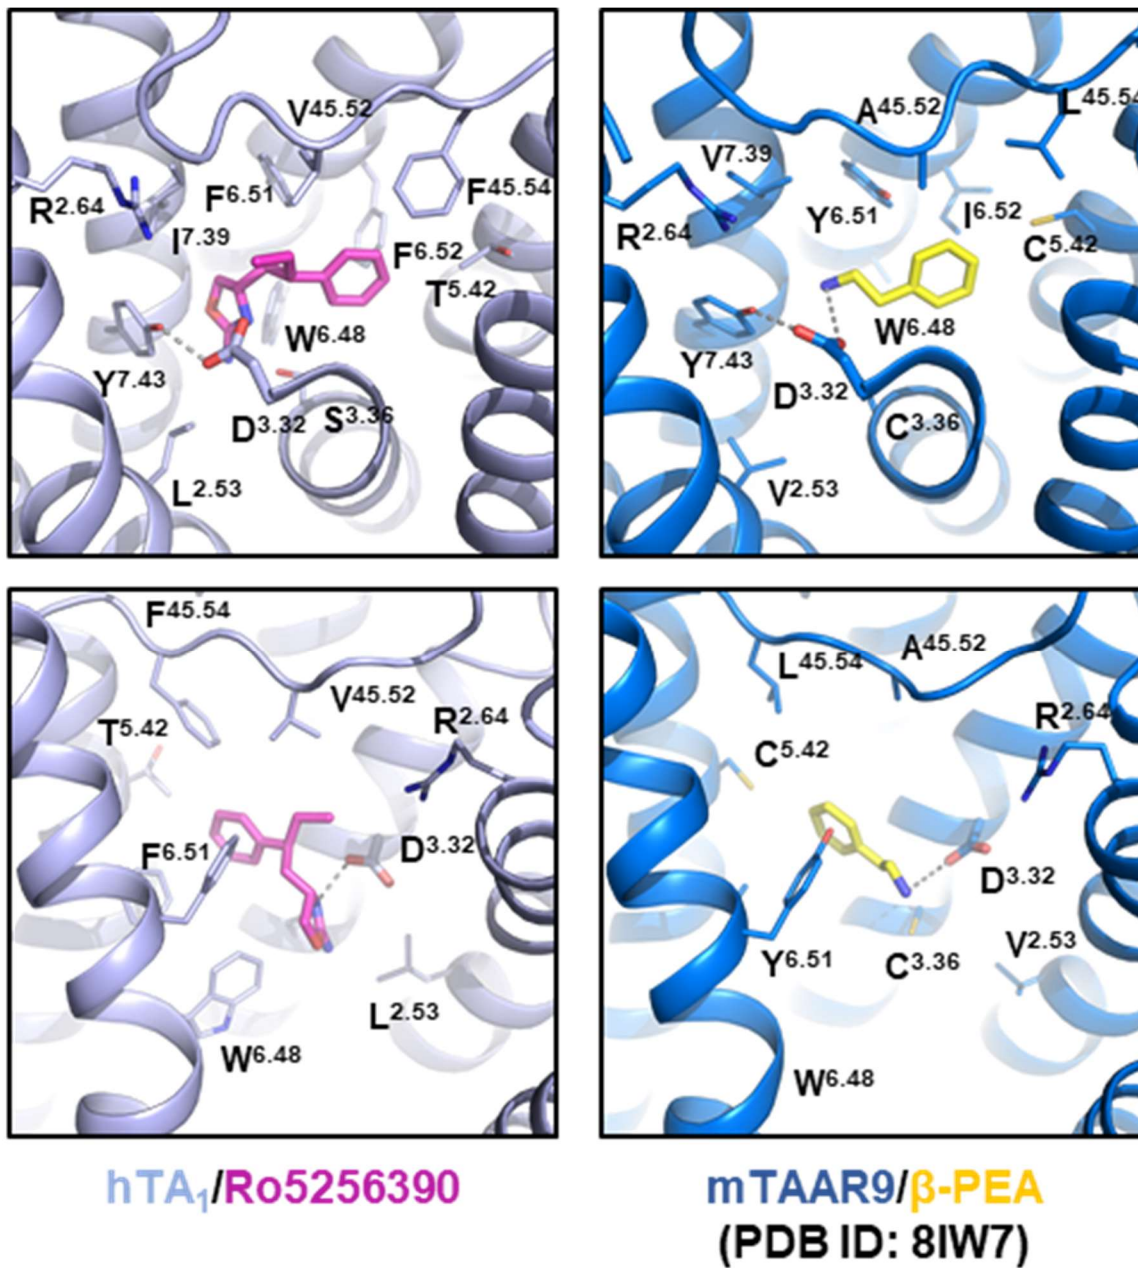

**Supplementary Fig. 4 | Role of key OBP residues in the activities of hTA1 agonists.** Zoom-in on OBP of hTA1 (light blue) and mTAAR9 (marine blue) with key residues shown as sticks (left). Two angles are shown and grey dashes indicate ionic bonds between the conserved residue D3.32 and the agonists Ro5256390 (magenta) and β-PEA (yellow).

| Receptor | Sequence Similarity/Identity [%]<br>(Full Sequence) | Sequence Similarity/Identity [%]<br>(Structurally Conserved Residue Positions) |
|----------|-----------------------------------------------------|--------------------------------------------------------------------------------|
| rTA1     | 83/77                                               | 82/76                                                                          |
| mTA1     | 82/74                                               | 86/78                                                                          |

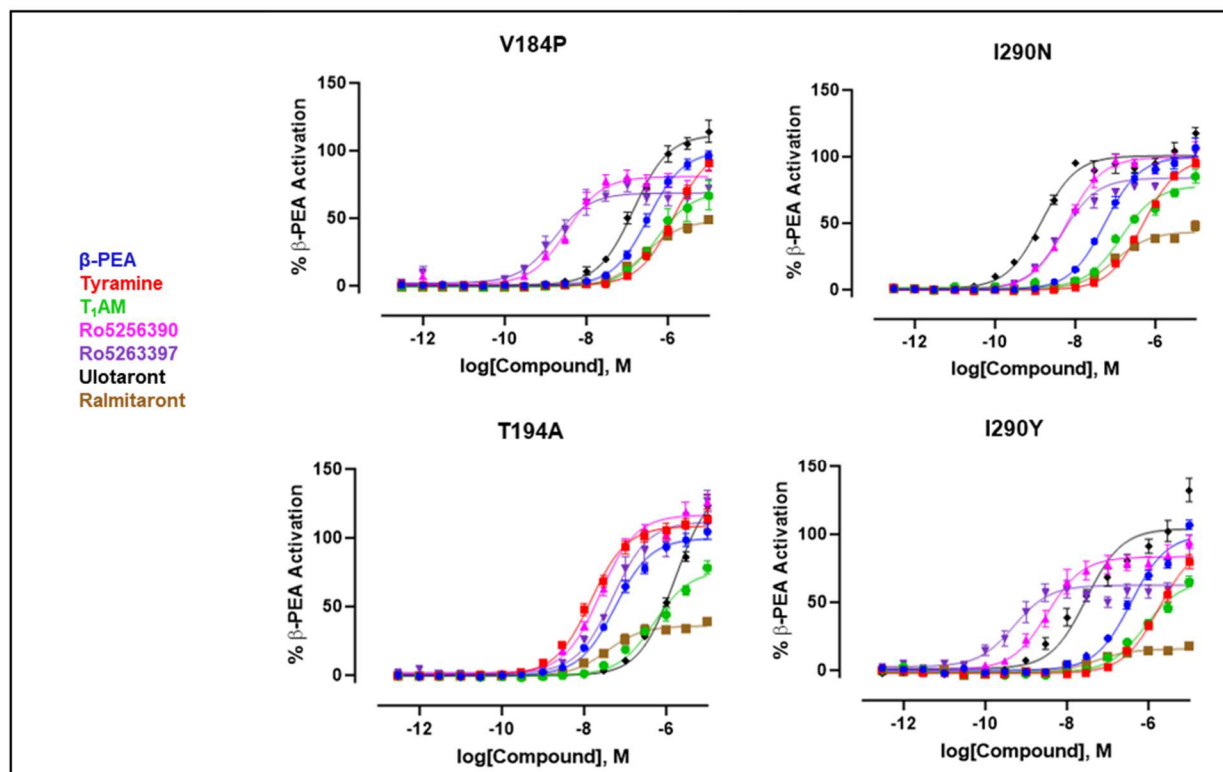

**Supplementary Fig. 5 | Implications of species differences for the activities of TA1 agonists.** Calculation of sequence similarity and identity for both complete receptor sequences or only structurally conserved positions between human and rodent TA1 (top). Effects of species-related residue substitutions on the activities of TA1 agonists (bottom). Data are shown as full concentration response curves and represent mean  $\pm$  SEM of two independent experiments (n=2) performed in triplicate. See Supplementary Table 1 for fitted parameter values.



| Receptor | Sequence Similarity/Identity [%]<br>(Full Sequence) | Sequence Similarity/Identity [%]<br>(Structurally Conserved Residue Positions) |
|----------|-----------------------------------------------------|--------------------------------------------------------------------------------|
| hTAAR2   | 56/42                                               | 69/53                                                                          |
| hTAAR3   | 60/44                                               | 68/50                                                                          |
| hTAAR5   | 51/33                                               | 59/41                                                                          |
| hTAAR6   | 54/36                                               | 63/43                                                                          |
| hTAAR8   | 49/32                                               | 58/39                                                                          |
| hTAAR9   | 54/38                                               | 61/43                                                                          |

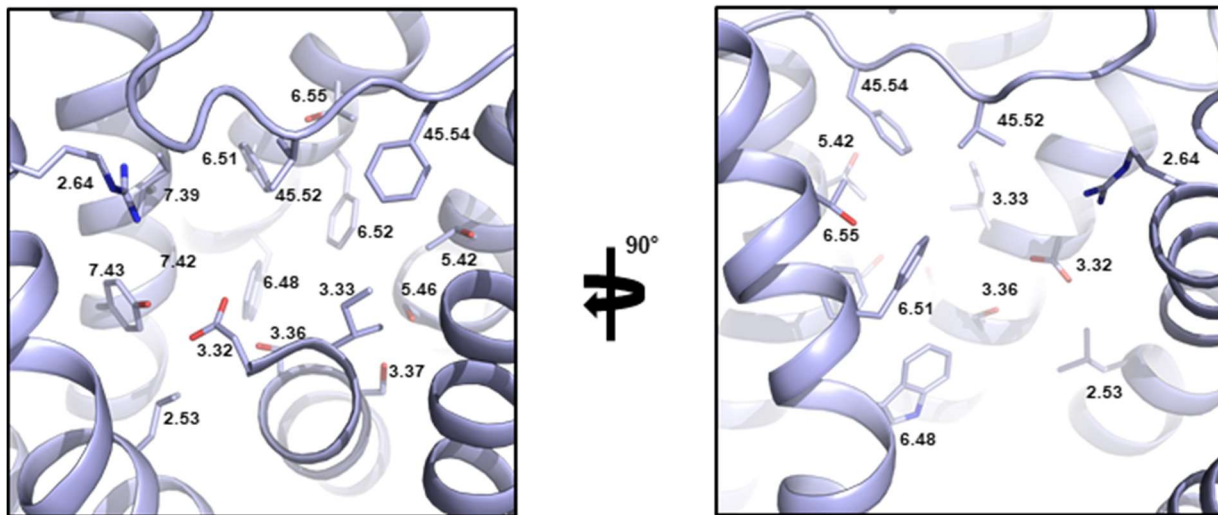

| Position | 2.53 | 2.64 | 3.32 | 3.33 | 3.36 | 3.37 | EL2 <sup>45,52</sup> | EL2 <sup>45,54</sup> | 5.42 | 5.46 | 6.48 | 6.51 | 6.52 | 6.55 | 7.39 | 7.42 | 7.43 |
|----------|------|------|------|------|------|------|----------------------|----------------------|------|------|------|------|------|------|------|------|------|
| HTA1     | L    | R    | D    | I    | S    | S    | V                    | F                    | T    | S    | W    | F    | F    | T    | I    | G    | Y    |
| h5-HT7R  | V    | T    | D    | V    | C    | T    | I                    | Q                    | S    | A    | W    | F    | F    | S    | L    | G    | Y    |
| h5-HT2AR | L    | T    | D    | V    | S    | T    | V                    | D                    | G    | S    | W    | F    | F    | N    | T    | G    | Y    |
| h5-HT2BR | V    | T    | D    | V    | S    | T    | L                    | K                    | G    | A    | W    | F    | F    | N    | I    | A    | Y    |
| h5-HT2CR | V    | A    | D    | V    | S    | T    | T                    | D                    | G    | A    | W    | F    | F    | N    | C    | A    | Y    |
| HDRD1    | V    | A    | D    | I    | S    | T    | S                    | L                    | S    | S    | W    | F    | F    | N    | V    | G    | W    |
| HDRD5    | V    | A    | D    | I    | S    | T    | S                    | L                    | S    | S    | W    | F    | F    | N    | V    | G    | W    |
| h5-HT5AR | V    | H    | D    | V    | C    | T    | L                    | R                    | S    | A    | W    | F    | F    | E    | V    | R    | Y    |
| hTAAR2   | L    | R    | D    | L    | S    | I    | V                    | F                    | L    | G    | W    | C    | F    | I    | T    | G    | Y    |
| hTAAR6   | V    | R    | D    | V    | C    | Y    | T                    | V                    | T    | S    | W    | Y    | S    | S    | C    | A    | Y    |
| hTAAR5   | L    | R    | D    | T    | C    | L    | L                    | L                    | L    | L    | W    | F    | T    | T    | I    | A    | Y    |

**Supplementary Fig. 6 | Similarities in the OBPs of hTA1, TAARs, and aminergic neurotransmitter receptors.** Calculation of sequence similarity and identity for both complete receptor sequences or only structurally conserved positions between hTA1

and the other members of the human TAAR family (top). Location of structurally conserved residue positions in the OBP of hTA1 (middle). Sequence alignment of corresponding structurally conserved positions residues (bottom). Most similar sequences are shown and ranked according to analysis done with tools of the GPCRdb.

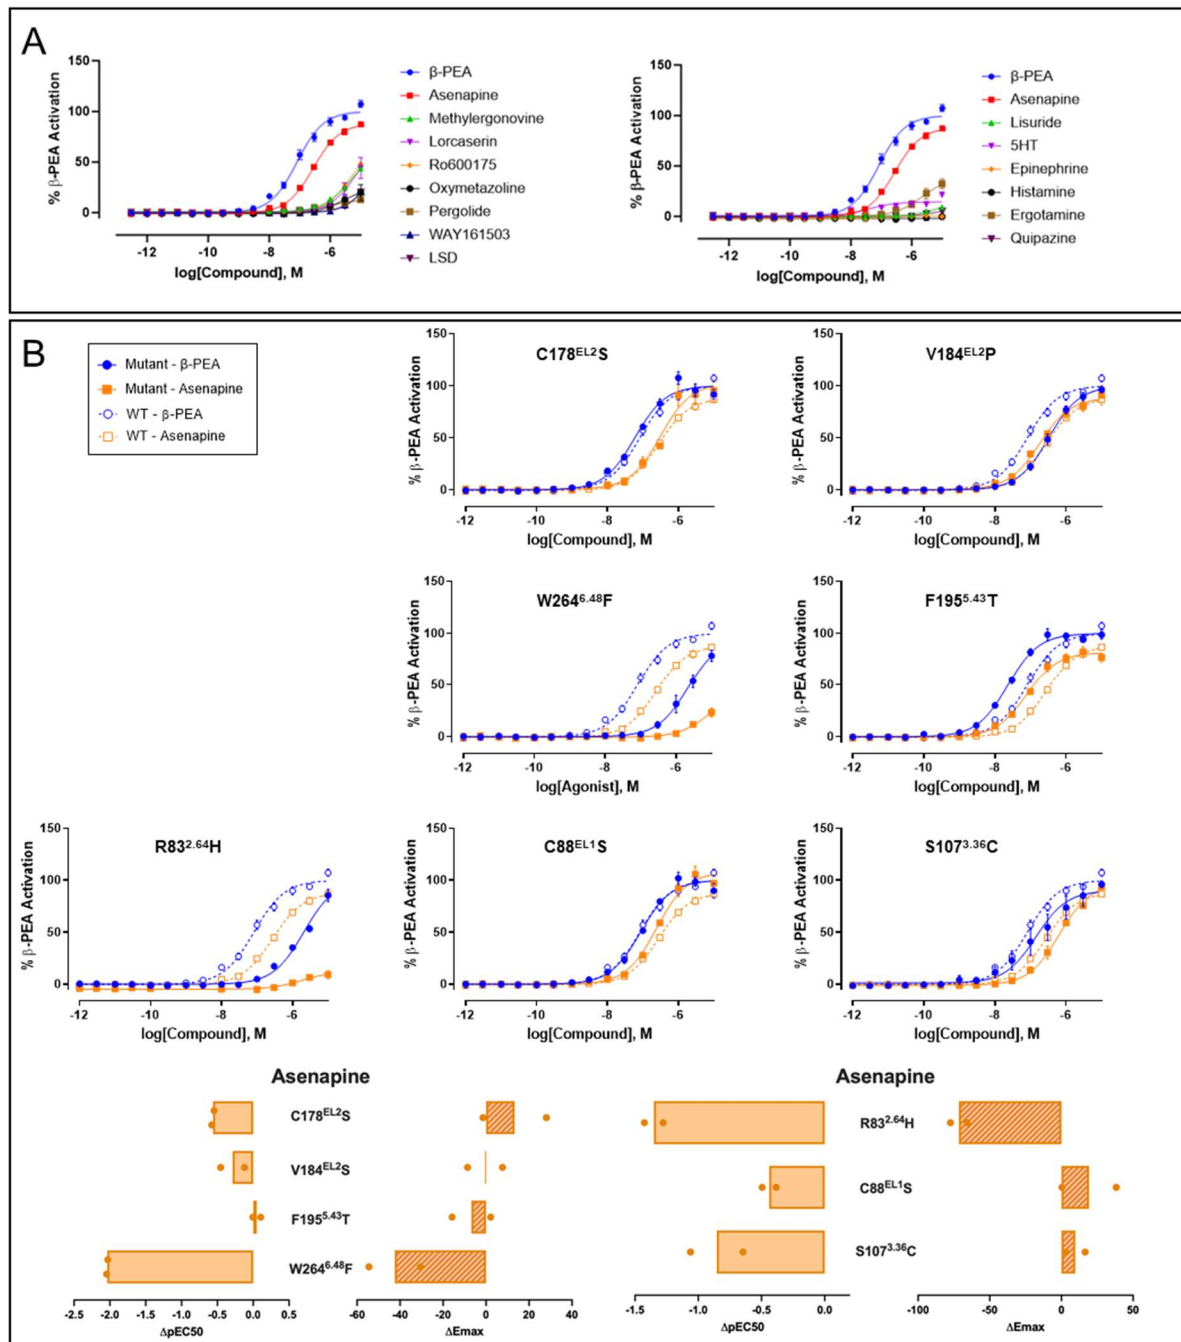

**Supplementary Fig. 7 | Off-target hTA1 activities of aminergic compounds and SAR studies of asenapine at hTA1. A**, Concentration response curves of top hits obtained from screening a curated aminergic compound library for hTA1 activities. Data represent mean  $\pm$  SEM of two independent experiments (n=2) performed in triplicate. See Supplementary Table 3 for single concentration values of individual compounds in

screen. **B**, Effects of OBP mutations on the activity of asenapine at hTA1. Data are shown both as full concentration response curves and as differences between mutant and wild type receptor with potencies determined as pEC<sub>50</sub>s and efficacies measured as E<sub>max</sub>. Data represent mean ± SEM of two independent experiments (n=2) performed in triplicate. See Supplementary Table 1 for fitted parameter values.

**Supplementary Table 1 | Efficacies and potencies of compounds at wildtype and mutant hTA1.** ND (not determined) indicates that mutations abolish signaling. Data represent mean pEC<sub>50</sub> ± SEM or mean E<sub>max</sub> ± SEM normalized to β-PEA of two independent experiments (n=2) for all mutants and three independent experiments (n=3) for wt hTA1. All experiments were performed in triplicate.

| hTA1 Construct   | β-PEA                   |            | Tyramine                |                 | T1AM                    |               | Ro5256390               |                | Ro5263397               |                | Ulotaront               |                | Ralmataront             |               | Asenapine               |                |
|------------------|-------------------------|------------|-------------------------|-----------------|-------------------------|---------------|-------------------------|----------------|-------------------------|----------------|-------------------------|----------------|-------------------------|---------------|-------------------------|----------------|
|                  | EC50 (nM) (pEC50 ± SEM) | Span ± SEM | EC50 (nM) (pEC50 ± SEM) | Span ± SEM      | EC50 (nM) (pEC50 ± SEM) | Span ± SEM    | EC50 (nM) (pEC50 ± SEM) | Span ± SEM     | EC50 (nM) (pEC50 ± SEM) | Span ± SEM     | EC50 (nM) (pEC50 ± SEM) | Span ± SEM     | EC50 (nM) (pEC50 ± SEM) | Span ± SEM    | EC50 (nM) (pEC50 ± SEM) | Span ± SEM     |
| WT               | 80.62 (7.09 ± 0.05)     | 100 ± 2.26 | 414.87 (6.38 ± 0.04)    | 98.98 ± 0.26    | 742.61 (6.13 ± 0.04)    | 70.45 ± 11.17 | 5.33 (8.27 ± 0.08)      | 103.3 ± 1.72   | 1.47 (8.83 ± 0.09)      | 86.7 ± 0.98    | 180 (6.74 ± 0.05)       | 109.03 ± 5.87  | 110.39 (6.96 ± 0.08)    | 40.11 ± 14.32 | 273.74 (6.56 ± 0.03)    | 88.71 ± 2.33   |
| CryoEM Construct | 17.39 (7.75 ± 0.04)     | 100 ± 1.84 | 234.72 (6.62 ± 0.04)    | 112.93 ± 2.5    | 491.32 (6.3 ± 0.04)     | 115.44 ± 2.84 | 2.47 (8.6 ± 0.06)       | 102.23 ± 2.88  | 1.5 (8.82 ± 0.06)       | 106.6 ± 2.69   | 49.24 (7.3 ± 0.06)      | 124.95 ± 3.35  | 1348.3 (5.87 ± 0.04)    | 107.48 ± 3.32 | 51.76 (7.28 ± 0.04)     | 95.22 ± 1.98   |
| b2N              | 25.45 (7.59 ± 0.07)     | 100 ± 3.11 | 150.67 (6.82 ± 0.05)    | 99.52 ± 1.00    | 224.09 (6.65 ± 0.05)    | 80.48 ± 20.30 | 1.56 (8.81 ± 0.07)      | 97.65 ± 9.34   | 0.66 (9.18 ± 0.09)      | 78.31 ± 9.88   | 39.64 (7.4 ± 0.06)      | 106.28 ± 0.92  | 25.69 (7.59 ± 0.06)     | 82.55 ± 4.39  | 72.78 (7.14 ± 0.06)     | 97.39 ± 0.96   |
| C5S              | 90.66 (7.04 ± 0.05)     | 100 ± 2.22 | 418.22 (6.38 ± 0.05)    | 97.41 ± 4.98    | 1114.99 (5.95 ± 0.04)   | 81.19 ± 8.03  | 9.93 (8 ± 0.06)         | 95.38 ± 2.26   | 3.89 (8.41 ± 0.07)      | 85.5 ± 2.16    | 365.03 (6.44 ± 0.06)    | 111.01 ± 10.49 | 167.73 (6.78 ± 0.05)    | 53.02 ± 3.33  | 260.62 (6.58 ± 0.05)    | 83.24 ± 1.59   |
| C13S             | 188.32 (6.73 ± 0.05)    | 100 ± 2.41 | 930.57 (6.03 ± 0.04)    | 102.3 ± 8.61    | 1013.87 (5.99 ± 0.05)   | 59.02 ± 5.94  | 9.21 (8.04 ± 0.06)      | 100.38 ± 3.73  | 2.48 (8.6 ± 0.08)       | 81.23 ± 7.68   | 357.44 (6.45 ± 0.04)    | 126.36 ± 7.99  | 140.12 (6.85 ± 0.1)     | 26.36 ± 2.60  | 320.93 (6.49 ± 0.05)    | 77.11 ± 4.84   |
| C88S             | 84.06 (7.08 ± 0.06)     | 100 ± 2.93 | 374.73 (6.43 ± 0.04)    | 109.25 ± 8.40   | 689.69 (6.16 ± 0.04)    | 64.41 ± 12.82 | 3.1 (8.51 ± 0.04)       | 121.71 ± 19.43 | 1.64 (8.78 ± 0.06)      | 100.25 ± 9.11  | 156.05 (6.81 ± 0.04)    | 127.32 ± 25.39 | 69.97 (7.16 ± 0.05)     | 77.92 ± 14.98 | 238.04 (6.62 ± 0.04)    | 108 ± 18.96    |
| C96S             | ND                      | ND         | ND                      | ND              | ND                      | ND            | ND                      | ND             | ND                      | ND             | ND                      | ND             | ND                      | ND            | ND                      | ND             |
| C178S            | 59.03 (7.23 ± 0.07)     | 100 ± 2.97 | 328.08 (6.48 ± 0.04)    | 98.36 ± 1.77    | 982.78 (6.01 ± 0.05)    | 86.82 ± 7.63  | 14.14 (7.85 ± 0.05)     | 119.57 ± 15.22 | 4.26 (8.37 ± 0.09)      | 105.17 ± 13.16 | 208.98 (6.88 ± 0.06)    | 111.31 ± 7.17  | 194.78 (6.71 ± 0.04)    | 69.54 ± 2.90  | 315.45 (6.5 ± 0.07)     | 102.03 ± 14.74 |
| C88/178S         | 131.00 (6.88 ± 0.05)    | 100 ± 2.48 | 516.05 (6.29 ± 0.06)    | 99.35 ± 4.80    | 1090.26 (5.96 ± 0.05)   | 98.9 ± 13.16  | 5.38 (8.27 ± 0.06)      | 111.12 ± 5.22  | 2.55 (8.59 ± 0.09)      | 98.55 ± 7.35   | 434.41 (6.36 ± 0.06)    | 146.47 ± 28.01 | 112.93 (6.95 ± 0.06)    | 65.82 ± 7.22  | 204.71 (6.69 ± 0.08)    | 86.32 ± 8.40   |
| W264F            | 2494.13 (5.6 ± 0.06)    | 100 ± 4.75 | 10321.72 (4.99 ± 0.08)  | 100.51 ± 1.29   | 11327.04 (4.95 ± 0.97)  | 28.7 ± 10.91  | 126.95 (6.9 ± 0.09)     | 76.56 ± 14.54  | 1650.09 (5.78 ± 0.06)   | 57.37 ± 4.79   | 5241.11 (5.28 ± 0.06)   | 110.15 ± 7.15  | 3534.69 (5.45 ± 0.11)   | 40.13 ± 7.28  | 9426.69 (5.03 ± 0.16)   | 46.21 ± 12.00  |
| R83H             | 2060.6 (5.69 ± 0.07)    | 100 ± 5.46 | 31400.86 (4.5 ± 1.31)   | 533.44 ± 448.15 | 11.69 (7.93 ± 0.33)     | 6.95 ± 12.95  | 5.19 (8.28 ± 0.11)      | 48.56 ± 10.14  | 3.18 (8.5 ± 0.15)       | 33.86 ± 8.09   | 2723.37 (5.56 ± 0.08)   | 102.49 ± 10.14 | 1.62 (8.79 ± 0.4)       | 2.51 ± 6.63   | 1945.56 (5.71 ± 0.18)   | 17.15 ± 5.82   |
| D103N            | ND                      | ND         | ND                      | ND              | ND                      | ND            | ND                      | ND             | ND                      | ND             | ND                      | ND             | ND                      | ND            | ND                      | ND             |
| S107C            | 205.38 (6.69 ± 0.71)    | 100 ± 3.55 | 186.37 (6.73 ± 1.37)    | 120.36 ± 12.75  | 1350.62 (5.87 ± 0.53)   | 72.05 ± 7.70  | 504.39 (6.3 ± 1.55)     | 88.84 ± 19.77  | 247.82 (6.61 ± 0.80)    | 112.19 ± 12.31 | 1668.03 (5.78 ± 0.11)   | 197.21 ± 61.30 | 117.78 (6.93 ± 0.66)    | 49.2 ± 7.85   | 617.91 (6.21 ± 0.21)    | 98.45 ± 6.76   |
| V184P            | 321.16 (6.49 ± 0.04)    | 100 ± 1.96 | 1490.18 (5.83 ± 0.06)   | 105.2 ± 5.68    | 539.16 (6.27 ± 0.05)    | 70.26 ± 20.95 | 3.3 (8.48 ± 0.1)        | 79.83 ± 1.63   | 1.89 (8.72 ± 0.1)       | 67.49 ± 4.18   | 143.18 (6.84 ± 0.06)    | 112.04 ± 2.48  | 272.95 (6.56 ± 0.06)    | 48.73 ± 0.14  | 167.89 (6.77 ± 0.07)    | 88.26 ± 8.11   |
| T194A            | 63.62 (7.23 ± 0.13)     | 100 ± 2.46 | 26.82 (7.84 ± 0.14)     | 108.77 ± 4.66   | 235.21 (6.41 ± 0.14)    | 99.97 ± 36.78 | 34.76 (7.62 ± 0.13)     | 115.79 ± 9.22  | 56.43 (7.32 ± 0.14)     | 110.06 ± 28.24 | 1030.06 (5.86 ± 0.12)   | 179.74 ± 55.90 | 69.44 (7.33 ± 0.13)     | 48.89 ± 20.44 | 540.32 (6.34 ± 0.11)    | 119.91 ± 53.22 |
| I290N            | 54.74 (7.26 ± 0.06)     | 100 ± 2.5  | 491.72 (6.31 ± 0.03)    | 99.42 ± 0.19    | 139.3 (6.86 ± 0.07)     | 76.97 ± 5.53  | 6.21 (8.21 ± 0.06)      | 98.98 ± 2.27   | 4.63 (8.33 ± 0.07)      | 83.69 ± 1.69   | 1.4 (8.85 ± 0.08)       | 99.97 ± 4.68   | 94.7 (7.02 ± 0.06)      | 43.63 ± 5.35  | 1001.59 (6 ± 0.04)      | 84.02 ± 6.25   |
| I290Y            | 371.9 (6.43 ± 0.07)     | 100 ± 3.64 | 1962.68 (5.71 ± 0.07)   | 98.99 ± 3.20    | 888.62 (6.05 ± 0.08)    | 68.94 ± 4.39  | 3.79 (8.42 ± 0.08)      | 84.11 ± 8.72   | 0.69 (9.16 ± 0.18)      | 61.58 ± 3.99   | 30.31 (7.52 ± 0.11)     | 103.23 ± 7.35  | 43.71 (7.36 ± 0.17)     | 17.57 ± 2.61  | 274.98 (6.56 ± 0.08)    | 51.07 ± 4.43   |
| F195T            | 23.54 (7.63 ± 0.07)     | 100 ±      | 6.34 (8.20 ± 0.59)      | 108.96 ± 10.72  | 213.01 (6.67 ± 1.32)    | 65.51 ± 6.79  | 2.90 (8.54 ± 0.14)      | 106.38 ± 1.33  | 20.93 (7.68 ± 0.60)     | 101.40 ± 5.29  | 121.61 (6.92 ± 0.11)    | 114.34 ± 1.09  | 620.51 (6.21 ± 0.79)    | 77.17 ± 9.48  | 77.08 (7.11 ± 0.05)     | 81.88 ± 8.97   |
| T271A            | 701.12 (6.15 ± 0.03)    | 100 ± 2.03 | 4846.81 (5.31 ± 0.05)   | 123.62 ± 14.54  | 3515.94 (5.45 ± 0.03)   | 68.29 ± 26.37 | 14.65 (7.83 ± 0.05)     | 95.49 ± 3.42   | 5 (8.3 ± 0.07)          | 81.70 ± 5.69   | 1990.28 (5.7 ± 0.03)    | 124.08 ± 6.22  | 150.54 (6.82 ± 0.05)    | 61.08 ± 4.08  | 1152.02 (5.94 ± 0.03)   | 94.79 ± 5.91   |
| T271N            | 374.35 (6.43 ± 0.06)    | 100 ± 3.3  | 862.88 (6.06 ± 0.04)    | 102.55 ± 3.93   | 560.2 (6.25 ± 0.03)     | 119.8 ± 27.24 | 12.58 (7.9 ± 0.07)      | 110.48 ± 10.78 | 5 (8.3 ± 0.07)          | 108.08 ± 8.54  | 1408.35 (5.85 ± 0.03)   | 133.69 ± 19.67 | 118.86 (6.92 ± 0.05)    | 87.44 ± 33.75 | 478.81 (6.32 ± 0.04)    | 121.93 ± 21.07 |

## Supplementary Table 2 | Cryo-EM data collection, refinement and validation statistics.

---

|                                           |                                                                       |
|-------------------------------------------|-----------------------------------------------------------------------|
|                                           | <b>Ro5256390/<br/>hTA1-Gs-Nb35<br/>(EMD-42268)<br/>(PDB ID: 8UHB)</b> |
| <hr/>                                     |                                                                       |
| <b>Data collection and processing</b>     |                                                                       |
| Magnification                             | 64,000                                                                |
| Voltage (kV)                              | 300                                                                   |
| Electron exposure (e-/Å <sup>2</sup> )    | 53.88                                                                 |
| Defocus range (µm)                        | -0.5 to -1.8                                                          |
| Pixel size (Å)                            | 1.069                                                                 |
| Symmetry imposed                          | C1                                                                    |
| Initial particle images (no.)             | 6,413,421                                                             |
| Final particle images (no.)               | 626,730                                                               |
| Map resolution (Å)                        | 3.35                                                                  |
| FSC threshold                             | 0.143                                                                 |
| Map sharpening B-factor (Å <sup>2</sup> ) | -160.3                                                                |
| <br>                                      |                                                                       |
| <b>Refinement</b>                         |                                                                       |
| Model composition                         |                                                                       |
| Non-hydrogen atoms                        | 8417                                                                  |
| Protein residues                          | 1075                                                                  |
| Ligands                                   | 1                                                                     |
| <br>                                      |                                                                       |
| R.m.s. deviations                         |                                                                       |
| Bond lengths (Å)                          | 0.004                                                                 |
| Bond angles (°)                           | 0.619                                                                 |
| <br>                                      |                                                                       |
| Validation                                |                                                                       |
| Clashscore                                | 9.16                                                                  |
| Poor rotamers (%)                         | 0                                                                     |
| <br>                                      |                                                                       |
| Ramachandran plot                         |                                                                       |
| Favored (%)                               | 94.15                                                                 |
| Allowed (%)                               | 5.85                                                                  |
| Disallowed (%)                            | 0                                                                     |

---



**Supplementary Table 3 | Activity of 10  $\mu$ M aminergic drugs at hTA1 as determined by cAMP accumulation in HEK293T cells.** Experiment was performed in quadruplicate. Compounds that met the activation threshold of  $2^* \log_2$  fold change ( $\log_2fc$ ) over DMSO baseline are highlighted in green.

| Compound            | Log <sub>2</sub> fc of DMSO $\pm$ SD | Compound            | Log <sub>2</sub> fc of DMSO $\pm$ SD |
|---------------------|--------------------------------------|---------------------|--------------------------------------|
| 2-Bromo-LSD         | 0.204 $\pm$ 0.413                    | LuAE58085           | -0.537 $\pm$ 0.285                   |
| 5-Methoxytryptamine | 0.523 $\pm$ 0.199                    | Lurasidone          | 0.764 $\pm$ 0.17                     |
| 5-HT                | 1.794 $\pm$ 0.316                    | LY266097            | 0.745 $\pm$ 0.161                    |
| Alprenolol          | 0.287 $\pm$ 0.164                    | LY393558            | -0.068 $\pm$ 0.169                   |
| Altanserin          | 0.684 $\pm$ 0.246                    | MDL109              | 0.532 $\pm$ 0.138                    |
| Amisulpride         | 0.706 $\pm$ 0.297                    | Mesulergine         | 0.848 $\pm$ 0.156                    |
| Amphetamine         | 4.026 $\pm$ 0.304                    | Methiothepin        | 0.061 $\pm$ 0.516                    |
| Aripiprazole        | 0.535 $\pm$ 0.101                    | Methylergonovine    | 3.724 $\pm$ 0.197                    |
| AS19                | 0.363 $\pm$ 0.116                    | NAD299              | 0.499 $\pm$ 0.12                     |
| Asenapine           | 5.497 $\pm$ 0.09                     | NAN190              | 0.472 $\pm$ 0.045                    |
| $\beta$ PEA         | 4.639 $\pm$ 0.205                    | Nemonapride         | 0.693 $\pm$ 0.106                    |
| BRL54443            | 0.531 $\pm$ 0.155                    | NPS ALX Compound 4a | 0.113 $\pm$ 0.157                    |
| Buspirone           | 0.318 $\pm$ 0.156                    | Olanzapine          | 0.461 $\pm$ 0.114                    |
| BW723C86            | 1.446 $\pm$ 0.158                    | Oxymetazoline       | 2.307 $\pm$ 0.106                    |
| Cabergoline         | 0.71 $\pm$ 0.188                     | Paliperidone        | 0.617 $\pm$ 0.048                    |
| Carvedilol          | -0.068 $\pm$ 0.072                   | Paroxetine          | 0.691 $\pm$ 0.092                    |
| Chlorpromazine      | -0.609 $\pm$ 0.29                    | Pergolide           | 2.403 $\pm$ 0.197                    |
| Clozapine           | 0.49 $\pm$ 0.077                     | Pimethixene         | -0.362 $\pm$ 0.331                   |
| CNO                 | 0.716 $\pm$ 0.038                    | Pimozide            | 0.756 $\pm$ 0.097                    |
| Cyanopindolol       | 0.302 $\pm$ 0.282                    | Prazosin            | -0.306 $\pm$ 0.266                   |
| Cyproheptadine      | 0.016 $\pm$ 0.047                    | Propranolol         | 0.404 $\pm$ 0.219                    |
| Dihydroergotamine   | -0.486 $\pm$ 0.177                   | Quinpirole          | 1.96 $\pm$ 0.167                     |
| DMSO                | 0.025 $\pm$ 0.571                    | Quipazine           | 2.286 $\pm$ 0.178                    |
| Donitriptan         | 1.034 $\pm$ 0.065                    | Raclopride          | -0.389 $\pm$ 0.224                   |
| DR 4485             | -0.406 $\pm$ 0.338                   | Rauwolscine         | 0.086 $\pm$ 0.118                    |
| Efavirenz           | -0.465 $\pm$ 0.094                   | Reserpine           | 0.436 $\pm$ 0.395                    |
| Epinephrine         | 2.118 $\pm$ 0.31                     | Risperidone         | 0.531 $\pm$ 0.099                    |
| Ergotamine          | 2.943 $\pm$ 0.086                    | Ritanserin          | 0.538 $\pm$ 0.204                    |
| Fananserin          | 0.199 $\pm$ 0.111                    | Ro600175            | 3.659 $\pm$ 0.062                    |
| Fluoxetine          | 0.566 $\pm$ 0.062                    | RS 39604            | -0.323 $\pm$ 0.189                   |
| Flupentixol         | 0.441 $\pm$ 0.111                    | RS 127445           | 1.34 $\pm$ 0.122                     |
| Fluphenazine        | 0.327 $\pm$ 0.238                    | SB204741            | -0.001 $\pm$ 0.155                   |
| GBR12909            | -1.05 $\pm$ 0.147                    | SB269970            | 0.493 $\pm$ 0.105                    |
| GMD281014           | -0.399 $\pm$ 0.181                   | SB399885            | -0.563 $\pm$ 0.171                   |
| Haloperidol         | 0.713 $\pm$ 0.2                      | SCH 23390           | 0.589 $\pm$ 0.103                    |
| Histamine           | 2.117 $\pm$ 0.232                    | Sertindole          | 1.07 $\pm$ 0.185                     |
| Ipsapirone          | -0.011 $\pm$ 0.211                   | Spiperone           | 0.261 $\pm$ 0.144                    |
| Ketanserin          | -0.697 $\pm$ 0.174                   | Sumatriptan         | 0.746 $\pm$ 0.109                    |
| LE300               | 0.473 $\pm$ 0.259                    | Tetrabenazine       | 0.51 $\pm$ 0.217                     |
| Lisuride            | 3.176 $\pm$ 0.306                    | Terguride           | 0.783 $\pm$ 0.353                    |
| Lobeline            | 0.044 $\pm$ 0.12                     | WAY161503           | 2.401 $\pm$ 0.253                    |
| Lorcaserin          | 4.221 $\pm$ 0.105                    | Yohimbine           | -0.506 $\pm$ 0.145                   |
| LP12                | 0.652 $\pm$ 0.109                    | Ziprasidone         | 0.339 $\pm$ 0.302                    |
| LSD                 | 2.923 $\pm$ 0.238                    | Zolmitriptan        | 0.583 $\pm$ 0.146                    |
|                     |                                      | Zotepine            | 0.272 $\pm$ 0.11                     |

## Supplementary Data

An uncropped gel of the gel provided in Supplementary Figure 1. Relevant lanes are indicated by a box, all other lanes correspond to material unrelated to this study.

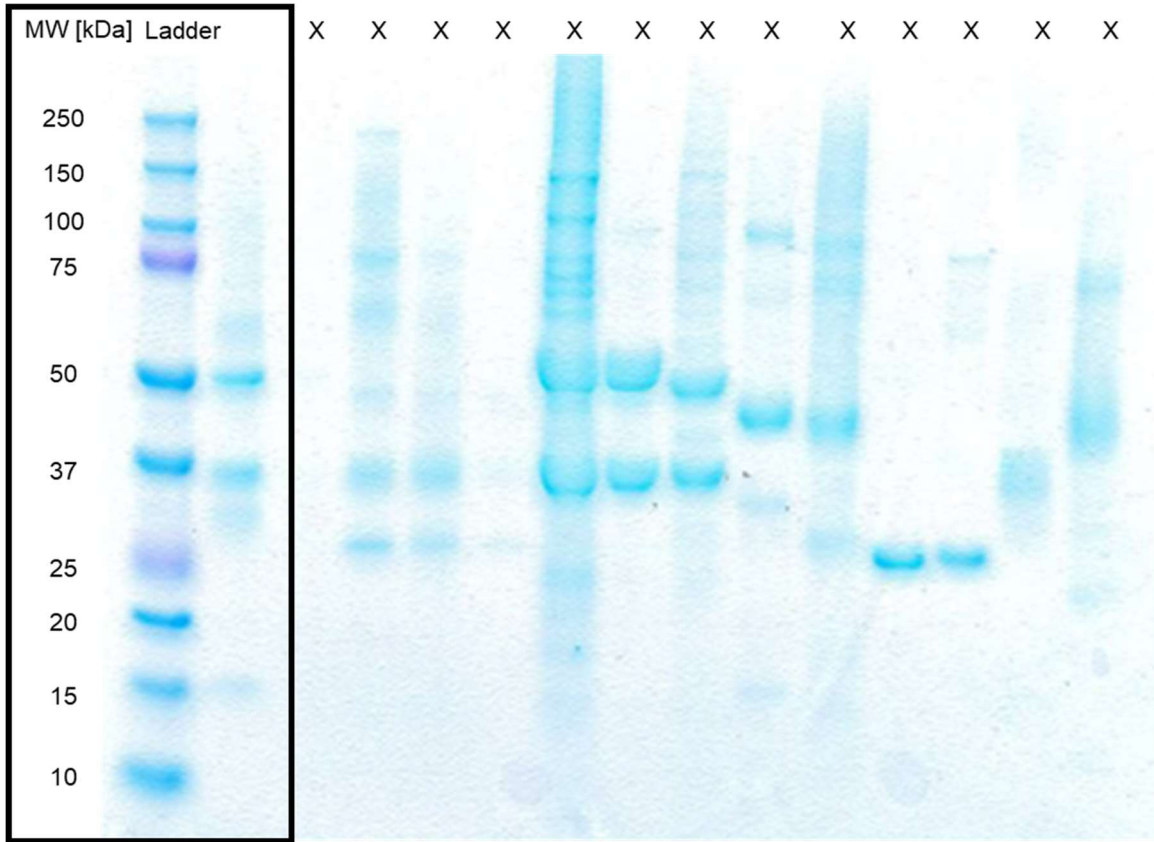

## Supplementary Primer Information

Oligonucleotides used to generate the mutants characterized in this publication.

|               |                          |
|---------------|--------------------------|
| TA1 I290Y F   | GACGTGCTTTACTGGTTCGGCTAT |
| TA1 I290N F   | GACGTGCTTAACTGGTTCGGCTAT |
| TA1 I290mut R | GTTCAGGGTGGGCGGTAT       |
| TA1 F112W F   | CGCTTCAATCTGGCACCT       |
| TA1 F112W R   | GGTGCCAGATTGAAGCGCTGC    |
| TA1 C5S F     | CTTTTTCTCATAATATC        |
| TA1 C5S R     | ATGAGAAAAAGGCATCATATC    |
| TA1 C13S F    | CAACATTTCTCCGTG          |
| TA1 C13S R    | CAATTGTTTTTCACGGAGGAAATG |
| TA1 C88S F    | CTCTGCCGAGCACTCTTGG      |
| TA1 C88S R    | CGAAATACCAAGAGTGC        |
| TA1 C96S F    | CGAAGTGTTCTCCAAAATTC     |
| TA1 C96S R    | GAATTTTGGAGAACAC         |

|             |                              |
|-------------|------------------------------|
| TA1 C178S F | CATGTCCACTCTCGG              |
| TA1 C178S R | CCACCCCGAGAGTGG              |
| TA1 C182S F | CGGGGTGGATCCTCCG             |
| TA1 C182S R | CTAAAAAACACGGAGGATCCACC      |
| TA1 D103N F | GTCTACGAATATCATGCTCAGC       |
| TA1 D103N R | CATGATATTCGTAGACGTGTGAATTTTG |
| TA1 F195T F | GTCCTGACGACCATGACTTCCT       |
| TA1 F195T R | GTCATGGTCGTCAGGACGC          |
| TA1 R83H F  | GGTCCACTCTGCCGAGCAC          |
| TA1 R83H R  | GGCAGAGTGGACCATGCTGTAG       |
| TA1 V184P F | ATGCTCCCCGTTTTTTAG           |
| TA1 V184P R | AAAACGGGGAGCATCC             |
| TA1 T194A F | TCCTGGCGTTCATGAC             |
| TA1 T194A R | AACGCCAGGACGC                |
| TA1 W264F F | CTGATATGTTTTTGTCTTTCTTC      |
| TA1 W264F R | AGGACAAAAACATATCAGAAAGAC     |
| TA1 T271N F | CATTTGTAATGTCATGGACCC        |
| TA1 T271N R | TGACATTACAAATGAAGAAAGGAC     |
| TA1 T271A F | TTTGTGCTGTCATGGAC            |
| TA1 T271A R | ACAGCACAAATGAAGAAAG          |
| TA1 S107C F | TCTGCAGCGCTTCAATC            |
| TA1 S107C R | GCTGCAGAGCATGATATCC          |
