# Supplementary material for: Molecular basis of human trace amine-associated receptor 1 activation
Source: PubMed Central journal article supplement (PMC10762035; doi:10.1038/s41467-023-44601-4), 2024-01-02
Supplement: 41467_2023_44601_MOESM3_ESM.pdf [file 41467_2023_44601_MOESM3_ESM.pdf]

### **Description of Additional Supplementary Files**

File Name: Supplementary Movie 1

Description: 3D variability analysis of the Ro5256390-bound hTA1-Gs-Nb35 complex reveals flexibility at receptor the N-terminus.

File Name: Supplementary Movie 2

Description: 3D variability analysis of the Ro5256390-bound hTA1-Gs-Nb35 complex reveals movements of receptor TM1.

File Name: Supplementary Movie 3

Description: 3D variability analysis of the Ro5256390-bound hTA1-Gs-Nb35 complex reveals movements of receptor TM4.

File Name: Supplementary Movie 4

Description: 3D variability analysis of the Ro5256390-bound hTA1-Gs-Nb35 complex reveals flexibility at the intracellular tips of TM5 and TM6.

File Name: Supplementary Movie 5

Description: 3D variability analysis of the Ro5256390-bound hTA1-Gs-Nb35 complex reveals twisting motion of the receptor TM bundle.
